# Supplementary material for: Clinical Predictors Influencing the Length of Stay in Emergency Department Patients Presenting with Acute Heart Failure
Source: PubMed Central journal article supplement (PMC7558979; doi:10.3390/medicina56090434), 2020-08-27
Supplement: medicina-56-00434-s001.pdf [file medicina-56-00434-s001.pdf]

**Supplementary Table S1.** Comparison of baseline clinical characteristics between patients who had data on NT-proBNP (n=207) and patients who did not have data on NT-proBNP (n=186).

| Characteristics                     | Have data on NT-ProBNP | No data on NT-ProBNP | p value |
|-------------------------------------|------------------------|----------------------|---------|
|                                     | (n=207)                | (n=186)              |         |
|                                     | n (%)                  | n (%)                |         |
| Age (years, mean±SD)                | 74.2±12.5              | 71.3±11.6            | 0.017   |
| Gender                              |                        |                      |         |
| Male                                | 79 (38%)               | 74 (40%)             | 0.757   |
| Female                              | 128 (62%)              | 112 (60%)            |         |
| Ethnicity                           |                        |                      |         |
| Thai                                | 204 (99%)              | 183 (100%)           |         |
| Non-Thai                            | 3 (1%)                 | 0(0)                 |         |
| Underlying conditions               |                        |                      |         |
| Chronic kidney disease              | 99 (48%)               | 107 (58%)            | 0.056   |
| Ischemic heart disease              | 84 (41%)               | 62 (33%)             | 0.145   |
| Diabetic Mellitus                   | 105 (51%)              | 104 (56%)            | 0.313   |
| Atrial fibrillation                 | 84 (41%)               | 53 (28%)             | 0.015   |
| NYHA class                          |                        |                      |         |
| 0-I                                 | 36 (17%)               | 20 (11%)             | 0.008   |
| II                                  | 54 (26%)               | 72 (39%)             |         |
| III                                 | 92 (45%)               | 83 (45%)             |         |
| IV                                  | 25 (12%)               | 11 (6%)              |         |
| Vital signs                         |                        |                      |         |
| BT (Celsius, mean±SD)               | 36.8±0.6               | 36.8±0.6             | 0.775   |
| SBP (mmHg, mean±SD)                 | 152.4±36.0             | 160.5±36.0           | 0.027   |
| HR (/min, mean±SD)                  | 90.6±24.7              | 87.2±21.0            | 0.139   |
| RR (/min, mean±SD)                  | 25.5±5.0               | 24.7±4.8             | 0.123   |
| Oxygen saturation (% , mean±SD)     | 93.5±5.4               | 94.8±6.4             | 0.027   |
| Biochemistry                        |                        |                      |         |
| NT-ProBNP (pg/mL, mean±SD)          | 14,240.1±18,384.5      | -                    |         |
| Serum Na (mmol/L, mean±SD)          | 136.8±5.8              | 136.9±6.0            | 0.781   |
| Hb (g/dL, mean±SD)                  | 10.8±2.1               | 10.8±2.5             | 0.827   |
| Alb (g/dL, mean±SD)                 | 3.0±0.5                | 3.0±0.5              | 0.951   |
| Length of stay (hour, median (IQR)) | 54.6 (17.5, 149.3)     | 27.5 (6.8, 102.2)    | <0.001  |

**Abbreviations:** NT-ProBNP, N-terminal pro b-type natriuretic peptide; SD, standard deviation; NYHA, New York Heart Association; BT, body temperature; SBP, systolic blood pressure; HR, heart rate; RR, respiratory rate; Na, sodium; Hb, hemoglobin; Alb, albumin; IQR, interquartile range.

**Supplementary Table S2.** Estimated LOS and LOS difference between patients with and without predictor from multivariable Poisson regression model together with the reduced model, and the sensitivity analysis model which includes baseline serum creatinine.

| Predictors             | Multivariable model            |         | Reduced model                  |         | Sensitivity analysis by including baseline serum creatinine |         |
|------------------------|--------------------------------|---------|--------------------------------|---------|-------------------------------------------------------------|---------|
|                        | LOS difference (hours) (95%CI) | P-value | LOS difference (hours) (95%CI) | P-value | LOS difference (hours) (95%CI)                              | P-value |
| Demographic            |                                |         |                                |         |                                                             |         |
| Age >65 years          | 40.5 (-7.3, 88.3)              | 0.097   | 42.2 (1.19, 83.3)              | 0.044   | 39.1 (-8.38, 86.6)                                          | 0.106   |
| Male                   | 21.8 (-37.3, 80.9)             | 0.469   | Not included                   |         | 25.9 (-34.9, 86.7)                                          | 0.404   |
| Comorbidities          |                                |         |                                |         |                                                             |         |
| Chronic kidney disease | 2.4 (-50.3, 55.2)              | 0.928   | Not included                   |         | 11.7 (-43.3, 66.7)                                          | 0.678   |
| Ischemic heart disease | 33.0 (-1.7, 81.7)              | 0.185   | Not included                   |         | 32.7 (-15.9, 81.4)                                          | 0.187   |
| Diabetic mellitus      | 8.8 (-47.6, 65.2)              | 0.759   | Not included                   |         | 13.5 (-44.9, 71.9)                                          | 0.651   |
| Atrial fibrillation    | 38.7 (-18.0, 95.4)             | 0.181   | Not included                   |         | 40.9 (-17.7, 99.3)                                          | 0.171   |
| NYHA functional class  |                                |         |                                |         |                                                             |         |
| III/IV                 | 72.9 (23.9, 121.8)             | 0.004   | 72.3 (25.1, 119.5)             | 0.003   | 73.9 (24.7, 123.1)                                          | 0.003   |
| Vital signs            |                                |         |                                |         |                                                             |         |
| SBP (mmHg)             |                                |         |                                |         |                                                             |         |
| <100                   | -48.0 (-130.7, 34.6)           | 0.255   |                                |         | -42.5 (-124.0, 39.0)                                        | 0.307   |
| 100-140                | Reference                      |         | Not included                   |         | Reference                                                   |         |
| >140                   | -14.9 (-67.4, 37.6)            | 0.579   |                                |         | -11.7 (-63.8, 40.3)                                         | 0.658   |
| RR >24 (/minute)       | 80.7 (28.0, 133.3)             | 0.003   | 76.5 (23.8, 129.1)             | 0.004   | 80.0 (27.9, 132.2)                                          | 0.003   |
| Biochemistry           |                                |         |                                |         |                                                             |         |
| NT-ProBNP ≥1800 pg/mL  | 16.1 (-1.4, 73.6)              | 0.583   | Not included                   |         | 21.4 (-38.1, 80.8)                                          | 0.481   |
| Serum Na <135 mmol/L   | 7.7 (-50.1, 65.4)              | 0.794   | Not included                   |         | 8.2 (-49.4, 65.8)                                           | 0.780   |
| Hb <10 g/dL            | 60.4 (8.6, 112.3)              | 0.022   | 63.6 (11.3, 116.0)             | 0.017   | 65.1 (11.5, 118.7)                                          | 0.017   |
| Alb <3.5 g/dL          | 52.8 (3.6, 102.0)              | 0.035   | 55.8 (5.9, 105.8)              | 0.028   | 55.9 (5.9, 106.0)                                           | 0.029   |

**Abbreviations:** LOS, length of hospital stay; SE, standard error; CI, confidence interval; NYHA, New York Heart Association; SBP, systolic blood pressure; RR, respiratory rate; NT-ProBNP, N-terminal pro b-type natriuretic peptide; Na, sodium; Hb, hemoglobin; Alb, albumin.
